# Supplementary material for: Rapid genotyping by low-coverage resequencing to construct genetic linkage maps of fungi: a case study in Lentinula edodes
Source: PubMed Central journal article supplement (PMC3750829; doi:10.1186/1756-0500-6-307), 2013-08-02
Supplement: 1756-0500-6-307-S4.pdf [file 1756-0500-6-307-S4.pdf]

**Table S2. Comparison of major *L. edodes* genetic linkage maps.**

| <b>Reference</b>  | <b>Mapping population size</b> | <b>Map size (cM)</b> | <b>No. of linkage groups</b> | <b>No. of markers</b> | <b>Average marker spacing (cM)*</b> | <b>No. of sequence-based markers</b> |
|-------------------|--------------------------------|----------------------|------------------------------|-----------------------|-------------------------------------|--------------------------------------|
| [8]               | 32                             | 622.4                | 14                           | 69                    | 11.3                                | 2                                    |
| [11]              | 95                             | 1956.7               | 11                           | 206                   | 10.0                                | 0                                    |
| [12]              | 95                             | 1398.4               | 11                           | 166                   | 9.0                                 | 10                                   |
| [9]               | 92                             | 908.8                | 11                           | 289                   | 3.3                                 | 23                                   |
| [10]              | 92                             | 908.8                | 11                           | 301                   | 3.1                                 | 35                                   |
| <b>This study</b> | <b>20</b>                      | <b>637.1</b>         | <b>13</b>                    | <b>200</b>            | <b>3.4</b>                          | <b>200</b>                           |

\* Calculated by dividing the size of map by the number of markers minus the number of linkage groups.
